# Supplementary material for: Ultra-sensitive and specific detection of ascorbic acid using a laser-engraved graphene electrode modified with a molecularly imprinted polymer
Source: Royal Society of Chemistry journal article supplement (doi:10.1039/d4tc04412f), 2025-01-01
Supplement: d4tc04412f1.pdf [file d4tc04412f1.pdf]

1  
2  
3  
4  
5  
6  
7  
8  
9  
10  
11  
12  
13  
14  
15  
16  
17  
18  
19  
20  
21

## Supplementary Information

### Ultra-Sensitive and Specific Detection of Ascorbic Acid using a Laser-Engraved Graphene Electrode Modified with Molecularly Imprinted Polymer

Wei Jin <sup>a,1</sup>, Handong Yao <sup>a,1</sup>, Xuefeng Wang <sup>b</sup>, Ming Li <sup>b,\*</sup>, Xinghua Gao <sup>a</sup>, Wei Chen <sup>c,\*</sup>,  
Yuan Zhang <sup>a,\*</sup>

<sup>a</sup> Materials Genome Institute, Shanghai Engineering Research Center for Integrated Circuits and  
Advanced Display Materials, Shanghai University, Shanghai 200444, China

<sup>b</sup> State Key Laboratory of Transducer Technology, Shanghai Institute of Microsystem and  
Information Technology, Chinese Academy of Sciences, Shanghai 200050, China

<sup>c</sup> Department of Emergency, Tongji Hospital, Tongji University School of Medicine, Shanghai  
200065, China

<sup>1</sup> W. Jin and H.D. Yao contributed equally to this work.

\* Corresponding author.

E-mail address: liming01@mail.sim.ac.cn (M. Li)

E-mail address: chenwei\_17@126.com (W. Chen)

E-mail address: zhangyuan@shu.edu.cn (Y. Zhang)

## 22 1. Optimization of laser defocus distance for LEG electrode fabrication

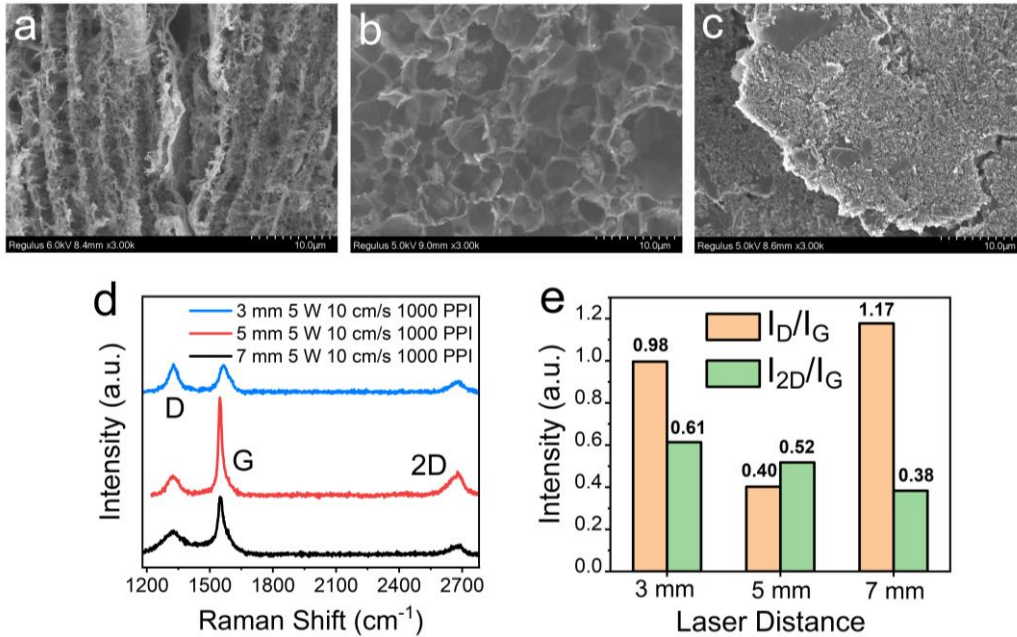

23  
24 Fig. S1 (a-c) Under the CO<sub>2</sub> laser parameters of a laser power of 5 W, a scanning speed of 10 cm/s,  
25 and a PPI of 1000, the SEM images of different LEG electrodes with a defocus distance of (a) 3  
26 mm, (b) 5 mm and (c) 7 mm. (d-e) Raman spectra and the ratio of different peak intensities of  
27 fabricated LEG electrodes.

28 To investigate the effect of laser defocus distance on the structure of graphene, the LEG  
29 electrodes with defocus distances of 3 mm, 5 mm, and 7 mm, maintaining a constant laser power  
30 of 5 W, scanning speed of 10 cm/s, and pulses per inch (PPI) of 1000 were fabricated. The  
31 prepared electrodes were characterized via SEM. In Fig. S1a, the three-dimensional (3D), linearly  
32 arranged pore-like structures emerged at a 3 mm defocus distance. Fig. S1b shows the regular  
33 porous structure obtained at the 5 mm defocus distance, while Fig. S1c shows the granular  
34 morphology at the 7 mm defocus distance. The Raman spectra presented in Fig. S1d for LEG  
35 electrodes exhibit clear D, G, and 2D peaks, indicating that the fabricated LEG electrodes have the  
36 typical characteristics of graphene material. Generally, the value of  $I_D/I_G$  can be used to estimate  
37 the disorder degree or defect density of graphene.<sup>1</sup> The larger the  $I_D/I_G$  ratio, the higher the degree  
38 of defects in the sample. Similarly, the value of  $I_{2D}/I_G$  can be utilized to evaluate the number of  
39 graphene layers.<sup>2</sup> Typically, as the number of graphene layers increases, the value of  $I_{2D}/I_G$   
40 decreases. It can be observed from Fig. S1e that when the defocus distance is 5 mm, the number of  
41 graphene layers prepared is the least amount, and the degree of defects is also relatively low.

42 **Reference**

- 43 1. W. Yu, W. Zhao, S. Wang, Q. Chen and X. Liu, *Advanced Materials*, 2023, **35**, 2209545.  
44 2. L. Cheng, C. S. Yeung, L. Huang, G. Ye, J. Yan, W. Li, C. Yiu, F.-R. Chen, H. Shen, B. Z.  
45 Tang, Y. Ren, X. Yu and R. Ye, *Nature Communications*, 2024, **15**, 2925.  
46

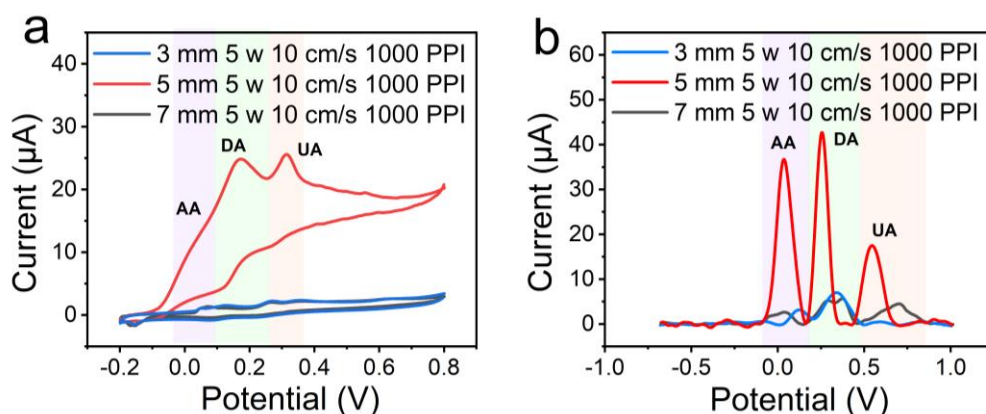

47  
48 Fig. S2 (a) Cyclic voltammetry (CV) and (b) differential pulse voltammetry (DPV) measurements  
49 of different LEG electrodes with defocus distance of 3 mm, 5 mm and 7 mm in a PBS buffer  
50 solution containing 2 mM AA, DA and UA.

51 The fabricated LEG electrodes were characterized using CV technique in a potential range  
52 from -0.2 V to 0.8 V vs. Ag/AgCl at a scan rate of 100 mV/s. As shown in Fig. S2a, the LEG  
53 electrodes prepared with a defocus distance of 5 mm exhibits oxidation peaks at approximately  
54 0.02 V (assigned to AA), 0.16 V (assigned to DA), and 0.31 V (assigned to UA) vs. Ag/AgCl.  
55 Conversely, LEG electrodes prepared with laser defocus distances of 3 mm and 7 mm do not  
56 exhibit significant oxidation peaks for these analytes. Similarly, when the defocus distance is 5  
57 mm, the prepared LEG electrode exhibits obvious oxidation peaks at about 0.02 V, 0.25 V, and 0.5  
58 V vs. Ag/AgCl (Fig. S2b). In contrast, when the defocus distance is 3 mm or 7 mm, the prepared  
59 LEG electrodes show relatively weak DPV response signals to the above three molecules (AA,  
60 UA, and DA), and the oxidation peak potentials shift to higher values. This highlights the specific  
61 and enhanced response of LEG electrodes prepared at a laser defocus distance of 5 mm to these  
62 three molecules. This may be due to the varying parameters of laser engraving, which result in  
63 differences in the structure of the prepared graphene electrode materials, thereby leading to  
64 different electrochemical properties. In conclusion, it can be seen that the LEG electrode prepared

65 at the defocusing distance of 5 mm exhibits a high current response and can effectively  
66 differentiate between AA, DA and UA, demonstrating excellent electrochemical sensing  
67 performance.

68

## 69 2. Optimization of laser power for LEG electrode fabrication

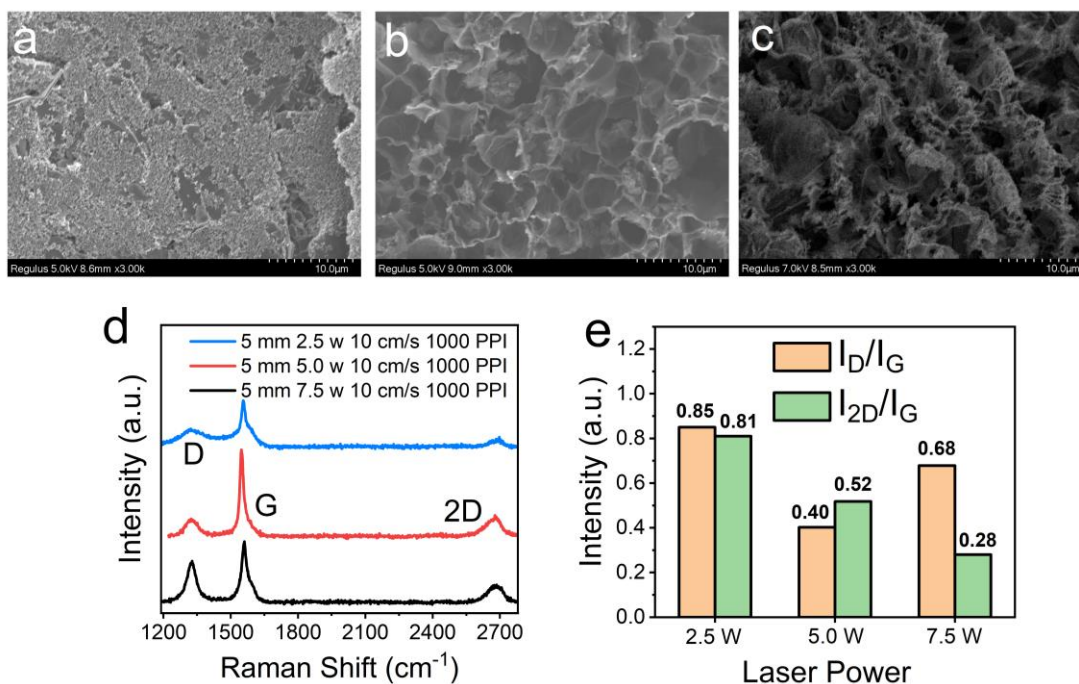

70

71 Fig. S3 (a-c) Under the CO<sub>2</sub> laser parameters of defocus distance of 5 mm, a scanning speed of 10  
72 cm/s, and a PPI of 1000, the SEM images of different LEG electrodes with a laser power of (a) 2.5  
73 W, (b) 5 W and (c) 7.5 W. (d-e) Raman spectra and the ratio of different peak intensities of  
74 fabricated LEG electrodes.

75 The LEG electrodes were then optimized under three laser powers of 2.5 W, 5 W, and 7.5 W,  
76 while maintaining a defocus distance of 5 mm, a scanning speed of 10 cm/s, and PPI of 1000. In  
77 Fig. S3a, when a laser power of 2.5 W is applied, the LEG electrode displays the morphology of  
78 particle aggregates. Conversely, Fig. S3b illustrates the successful achievement of a regular porous  
79 structure at a laser power of 5 W. The electrode processed at a laser power of 7.5 W (Fig. S3c)  
80 exhibits a disordered folded structure. The Raman spectra presented in Fig. S3d demonstrates that  
81 the graphene electrodes were successfully fabricated under different laser powers. Furthermore, by  
82 thoroughly comparing the ratios of  $I_D/I_G$  and  $I_{2D}/I_G$  presented in Fig. S3e, it is evident that the  
83 quality of the LEG electrode reaches its optimum when processed at a laser power of 5 W.

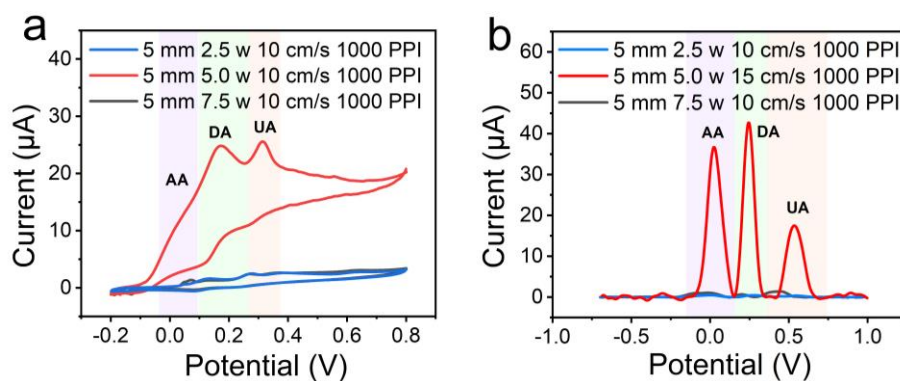

84

85 Fig. S4 (a) CV and (b) DPV measurements of different LEG electrodes with laser power of 2.5 W,  
 86 5 W and 7.5 W in PBS buffer solution containing 2 mM AA, DA and UA.

87 In Fig. S4a, the LEG electrode fabricated using laser power of 5 W displays significant  
 88 oxidation peaks from AA, DA, and UA. However, the electrode prepared using laser powers of 2.5  
 89 W and 7.5 W have almost no electrochemical response for the three molecules. The result of DPV  
 90 measurements is consistent with the CV tests, indicating that the LEG electrodes fabricated at a  
 91 laser power of 5 W possess satisfactory electrochemical properties (Fig. S4b).

92

### 93 3. Optimization of laser scanning speed for LEG electrode fabrication

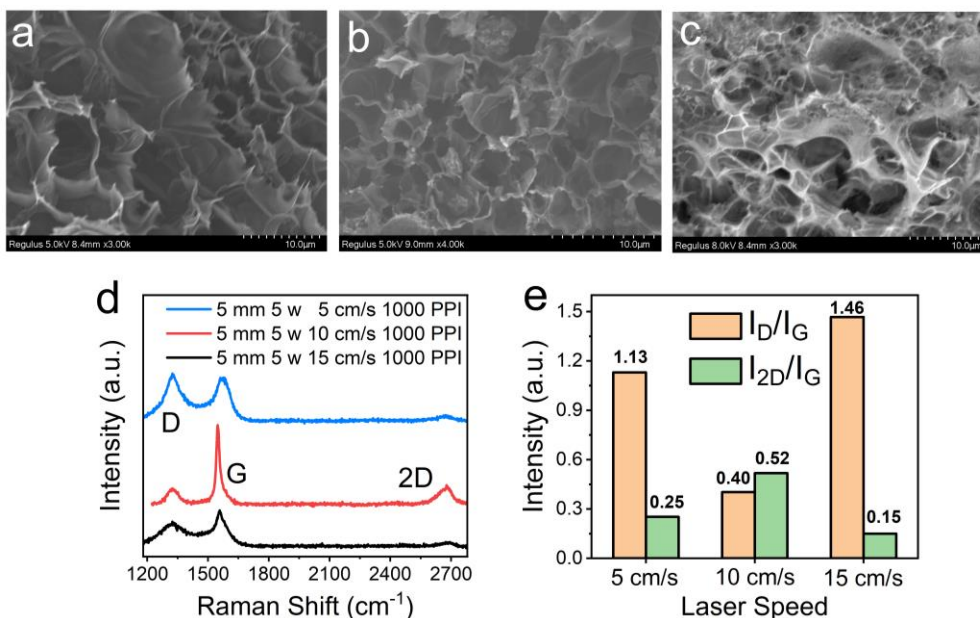

94

95 Fig. S5 (a-c) Under the CO<sub>2</sub> laser parameters of defocus distance of 5 mm, a laser power of 5 W,  
 96 and a PPI of 1000, the SEM images of different LEG electrodes with a scanning speed of (a) 5  
 97 cm/s, (b) 10 cm/s and (c) 15 cm/s. (d-e) Raman spectra and the ratio of different peak intensities of  
 98 fabricated LEG electrodes.

99 Subsequently, the laser scanning speed for LEG electrodes was optimized under the  
100 conditions of a fixed defocus distance of 5 mm, a laser power of 5 W, and a PPI of 1000, with  
101 three speeds tested: 5 cm/s, 10 cm/s, and 15 cm/s. Porous structures of graphene were observed at  
102 all three scanning speeds (Fig. S5a-c). However, compared to the graphene prepared at the other  
103 speeds, the graphene fabricated at a scanning speed of 10 cm/s exhibited a more regular 3D porous  
104 morphology (Fig. S5b). Raman spectra displayed clear characteristic peaks of graphene (Fig. S5d),  
105 indicating the successful formation of graphene materials at all three scanning speeds. Specifically,  
106 when scanned at a speed of 10 cm/s, the prepared LEG electrode demonstrated higher  $I_{2D}/I_G$  ratio,  
107 suggesting the presence of the least number of graphene layers during this scanning process.

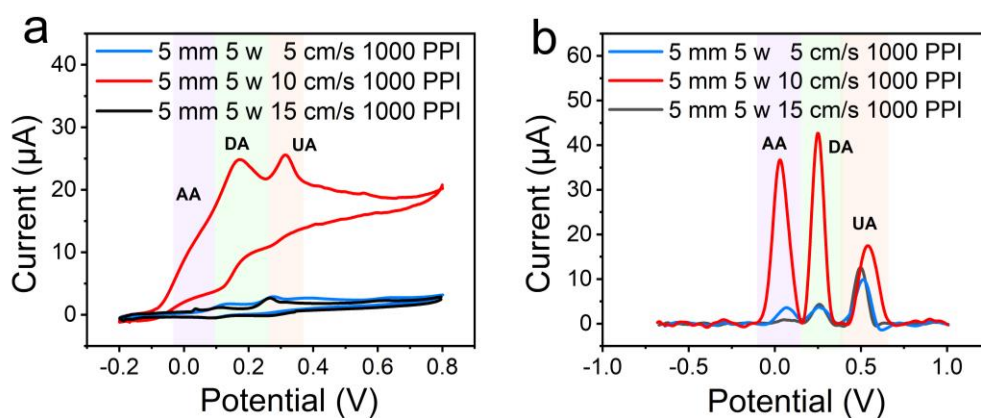

108  
109 Fig. S6 (a) CV and (b) DPV measurements of different LEG electrodes with scanning speed 5  
110 cm/s, 10 cm/s and 15 cm/s in a PBS buffer solution containing 2 mM AA, DA and UA.

111 Fig. S6a illustrates that the produced LEG electrodes exhibit weak oxidation peaks to AA,  
112 DA, and UA when the laser scanning speed setting at 5 cm/s and 15 cm/s, respectively. On the  
113 contrary, the prepared LEG electrode at a scanning speed of 10 cm/s shows a significant current  
114 response for the three analytes (Fig. S6a). The DPV measurements clearly reveal that the LEG  
115 electrode under the scanning speed of 10 cm/s can distinguish between the three molecules (Fig.  
116 S6b). Considering the above results, the electrochemical sensing performance of the LEG  
117 electrode is optimal at a laser scanning speed of 10 cm/s.

118  
119  
120  
121  
122



123 **4. Optimization of PPI for LEG electrode fabrication**

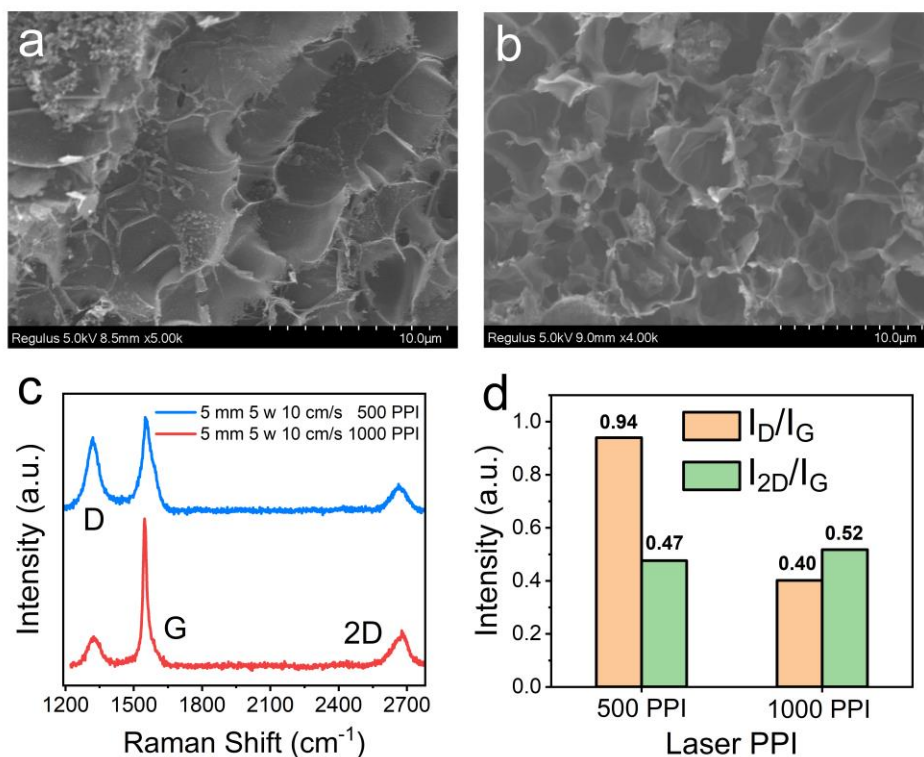

124  
 125 Fig. S7 (a-b) Under the CO<sub>2</sub> laser parameters of defocus distance of 5 mm, a laser power of 5 W,  
 126 and a scanning speed of 10 cm/s, the SEM images of different LEG electrodes with a PPI of (a)  
 127 500 and (b) 1000. (c-d) Raman spectra and the ratio of different peak intensities of fabricated LEG  
 128 electrodes.

129 Furthermore, the laser PPI value of LEG electrodes was optimized under the CO<sub>2</sub> laser  
 130 parameters of a defocus distance of 5 mm, a laser power of 5 W, and a scanning speed of 10 cm/s.  
 131 As shown in Fig. S7a, the graphene prepared at 500 PPI exhibits wrinkled morphology and lacks a  
 132 distinct porous structure. The relatively low  $I_D/I_G$  ratio and the high  $I_{2D}/I_G$  ratio indicate that the  
 133 graphene prepared under the processing parameter of 1000 PPI has relatively fewer defects and a  
 134 thinner graphene layer.

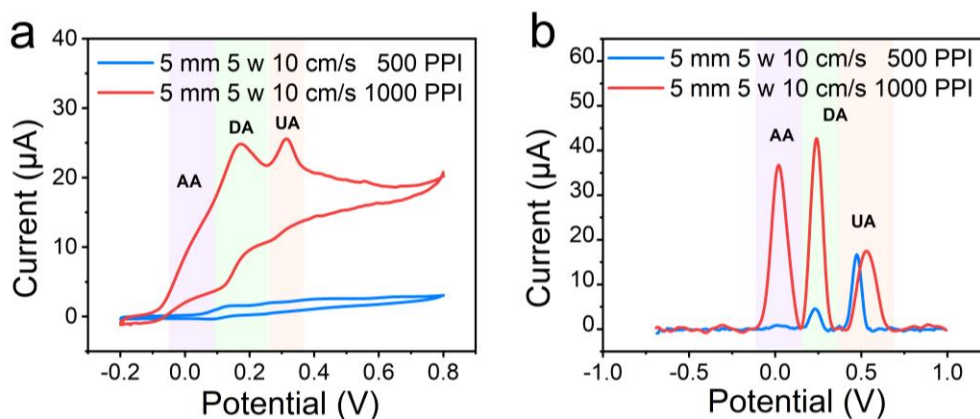

135  
 136 Fig. S8 (a) CV and (b) DPV measurements of different LEG electrodes with PPI of 500 and 1000  
 137 in a PBS buffer solution containing 2 mM AA, DA and UA.

138 As demonstrated in Fig. S8a, the CV curve clearly shows three separate oxidation peaks  
 139 corresponding to AA, DA, and UA at a PPI of 1000. In contrast, the LEG electrode prepared with  
 140 a PPI of 500 demonstrates a minimal response to these three molecules. In the DPV test, the LEG  
 141 electrode with a PPI of 500 exhibits virtually no response to AA, DA, and UA in contrast to the  
 142 LEG electrode with a PPI of 1000. In summary, the optimal performance of the LEG electrode has  
 143 achieved at a laser power of 5 W, a defocus distance of 5 mm, a scanning speed of 10 cm/s, and a  
 144 PPI of 1000.

145

## 146 5. Characterization of LEG electrode

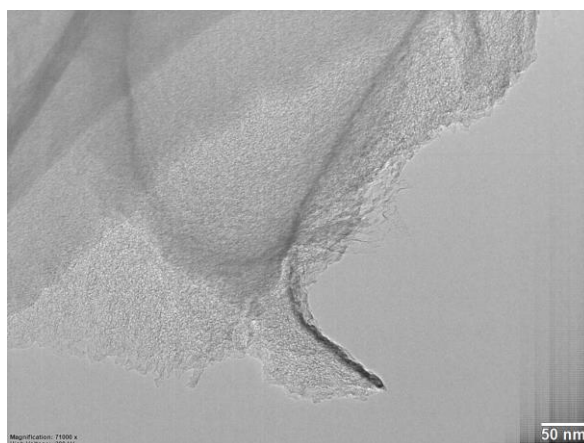

147

148 Fig. S9 The TEM characterization of graphene on LEG electrode. TEM characterization clearly reveals  
 149 the structural features of ultrathin graphene.



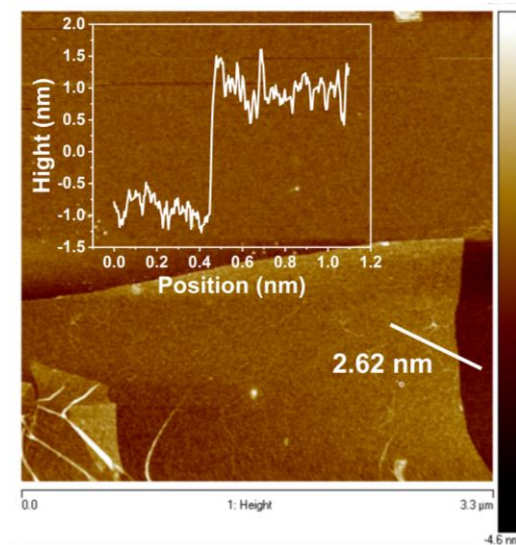

150

151 Fig. S10 The AFM characterization of graphene on LEG electrode. AFM characterization shows  
 152 that the thickness of the prepared graphene is about 2.62 nm.

153

## 154 6. Fitting results obtained from Nyquist plots

155 Table S1. The values of  $R_s$ ,  $R_{ct}$ ,  $C_{dl}$ , and  $Z_w$  for the equivalent circuit model.

|         | $R_s$ ( $\Omega \cdot \text{cm}^2$ ) | $R_{ct}$ ( $\Omega \cdot \text{cm}^2$ ) | $C_{dl}$ ( $\Omega^{-1} \cdot \text{cm}^{-2} \cdot \text{s}^a$ ) | $Z_w$ ( $\Omega \cdot \text{cm}^2$ ) |
|---------|--------------------------------------|-----------------------------------------|------------------------------------------------------------------|--------------------------------------|
| LEG     | 170.6                                | 0.5                                     | 33.1                                                             | 3883.2                               |
| PPD/LEG | 146.7                                | 0.6                                     | 56.5                                                             | 1537.3                               |

156 \*a is the exponent in the equation for the constant phase element (CPE) ( $Z_{CPE} = Z_{dl}(j\omega)^{-a}$ ).

157
